# Supplementary material for: Diet Quality and Health Service Utilization for Depression: A Prospective Investigation of Adults in Alberta’s Tomorrow Project
Source: Nutrients. 2020 Aug 13;12(8):2437. doi: 10.3390/nu12082437 (PMC7468802; doi:10.3390/nu12082437)
Supplement: Supplementary file 1 [file nutrients-12-02437-s001.pdf]

# Supplemental Figure S1

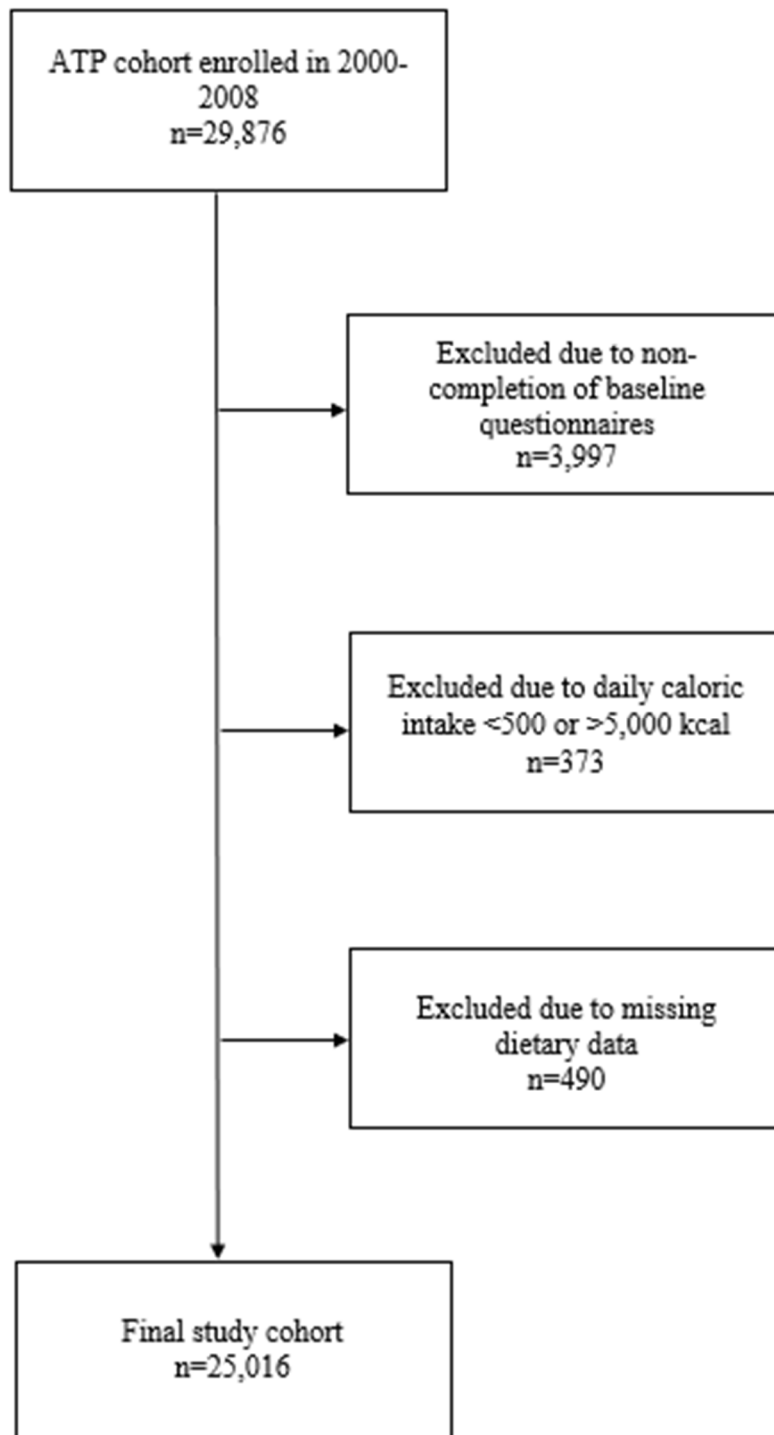

Figure S1. Flow chart for the inclusion and exclusion of Alberta's Tomorrow Project (ATP) cohort (2000-2008)

Table S1. Scoring Criteria for the Healthy Eating Index-Canada 2015

| Maximum Points    | Component                   | Standard for Maximum Points | Standard for Minimum Score of Zero  |
|-------------------|-----------------------------|-----------------------------|-------------------------------------|
| <i>Adequacy</i>   |                             |                             |                                     |
| 10                | Total Fruits and Vegetables | 7-8 servings                | No Fruits and Vegetables            |
| 5                 | Whole Fruits                | 1.47-1.68 servings          | No Whole Fruits                     |
| 5                 | Greens and Beans            | 0.74-0.84 servings          | No Dark Green Vegetables or Legumes |
| 10                | Whole Grains                | 3-4 servings                | No Whole Grains                     |
| 10                | Dairy                       | 2-3 servings                | No Dairy                            |
| 5                 | Total Protein Foods         | 2-3 servings                | No Protein Foods                    |
| 5                 | Seafood and Plant Proteins  | 0.64-0.96 servings          | No Seafood or Plant Proteins        |
| 10                | Fatty Acids                 | (PUFA+MUFA)/SFA $\geq$ 2.5  | (PUFA+MUFA)/SFA $\leq$ 1.2          |
| <i>Moderation</i> |                             |                             |                                     |
| 10                | Refined Grains              | <50% of grains refined      | 100% of grains refined              |
| 10                | Sodium                      | $\leq$ UL                   | $\geq$ 2x UL                        |
| 10                | Added Sugars                | $\leq$ 6.5% of energy       | $\geq$ 26% of energy                |
| 10                | Saturated Fats              | $\leq$ 8% of energy         | $\geq$ 16% of energy                |

**Abbreviations:** HEI-C 2015, Healthy Eating Index Canada 2015; MUFA, Monounsaturated Fatty Acids; PUFA, Polyunsaturated Fatty Acids; SFA, Saturated Fatty Acids; UL, Tolerable Upper Intake Level

Table S2. ICD 9/10 and ATC Codes Identifying Physician Visits for Depression

| <b>ICD-9/10 and ATC codes</b>                                                                                                                                                                                                                                                                                                                                                                                                                                                                                                                                                                                           |
|-------------------------------------------------------------------------------------------------------------------------------------------------------------------------------------------------------------------------------------------------------------------------------------------------------------------------------------------------------------------------------------------------------------------------------------------------------------------------------------------------------------------------------------------------------------------------------------------------------------------------|
| Inpatient data<br>ICD-9: 296.2-296.8; 300.4; 309; 311;<br>ICD-10: F31; F32; F33; F34.1; F38.0; F38.1; F41.2; F43.1; F43.2; F43.8; F53.0; F93.0<br><b>OR</b><br>Claim data<br>ICD-9: 296; 309; 311<br><b>OR</b><br>Inpatient data<br>ICD-9: 300;<br>ICD-10: F32.0; F34.1; F40; F41; F42; F44; F45.0; F45.1; F45.2; F48; F68.0; F99<br><b>AND</b><br>ABC/PIN dispense data within 6 months of hospitalization<br>ATC: N03AB02; N03AB52; N03AF01; N05AN01; N06A<br><b>OR</b><br>Claim data<br>ICD-9: 300<br><b>AND</b><br>ABC/PIN dispense data within 6 months of claims<br>ATC: N03AB02; N03AB52; N03AF01; N05AN01; N06A |
| <b>Abbreviations:</b> ABC, Alberta Blue Cross; ATC, Anatomical Therapeutic Chemical Classification; ICD, International Classification of Diseases; PIN, Pharmaceutical Information Network                                                                                                                                                                                                                                                                                                                                                                                                                              |

Table S3. ICD 9/10 and ATC Codes Identifying Physician Visits for Mental Illness<sup>a</sup>

| ICD-9/10 and ATC codes                                                                                                                                                                                                                                                                                                                                                                                                                                                                                                                                                                                                                                                                                                                                                                |
|---------------------------------------------------------------------------------------------------------------------------------------------------------------------------------------------------------------------------------------------------------------------------------------------------------------------------------------------------------------------------------------------------------------------------------------------------------------------------------------------------------------------------------------------------------------------------------------------------------------------------------------------------------------------------------------------------------------------------------------------------------------------------------------|
| Inpatient data<br>ICD-9: 296.2-296.8; 300.4; 309; 311;<br>ICD-10: F31; F32; F33; F34.1; F38.0; F38.1;<br>F41.2; F43.1; F43.2; F43.8; F53.0; F93.0<br><b>OR</b><br>Claim data<br>ICD-9: 291; 292; 293; 294; 295; 296; 297; 298; 300<br>excluding 300.14, 300.15, 300.16, 300.19, 300.8,<br>300.81, 300.82; 301.1; 303; 304; 305.2-305.9; 309;<br>311<br><b>OR</b><br>Inpatient data<br>ICD-9: 300;<br>ICD-10: F32.0; F34.1; F40; F41; F42; F44; F45.0;<br>F45.1; F45.2; F48; F68.0; F99<br><b>AND</b><br>ABC/PIN dispense data within 6 months of<br>hospitalization<br>ATC: N03AB02; N03AB52; N03AF01; N05AN01;<br>N06A<br><b>OR</b><br>Claim data<br>ICD-9: 300<br><b>AND</b><br>ABC/PIN dispense data within 6 months of claims<br>ATC: N03AB02; N03AB52; N03AF01; N05AN01;<br>N06A |
| <b>Abbreviations:</b> ABC, Alberta Blue Cross; ATC, Anatomical Therapeutic Chemical Classification; ICD, International Classification of Diseases; PIN, Pharmaceutical Information Network                                                                                                                                                                                                                                                                                                                                                                                                                                                                                                                                                                                            |

<sup>a</sup> Includes visits for depression, anxiety disorders, affective disorders, organic and non-organic psychoses, and substance use disorders.
